# Supplementary material for: Molecular epidemiology and evolutionary histories of human coronavirus OC43 and HKU1 among patients with upper respiratory tract infections in Kuala Lumpur, Malaysia
Source: PubMed Central journal article supplement (PMC4766700; doi:10.1186/s12985-016-0488-4), 2016-02-25

# HCoV-OC43 Nucleocapsid gene (1484bp)

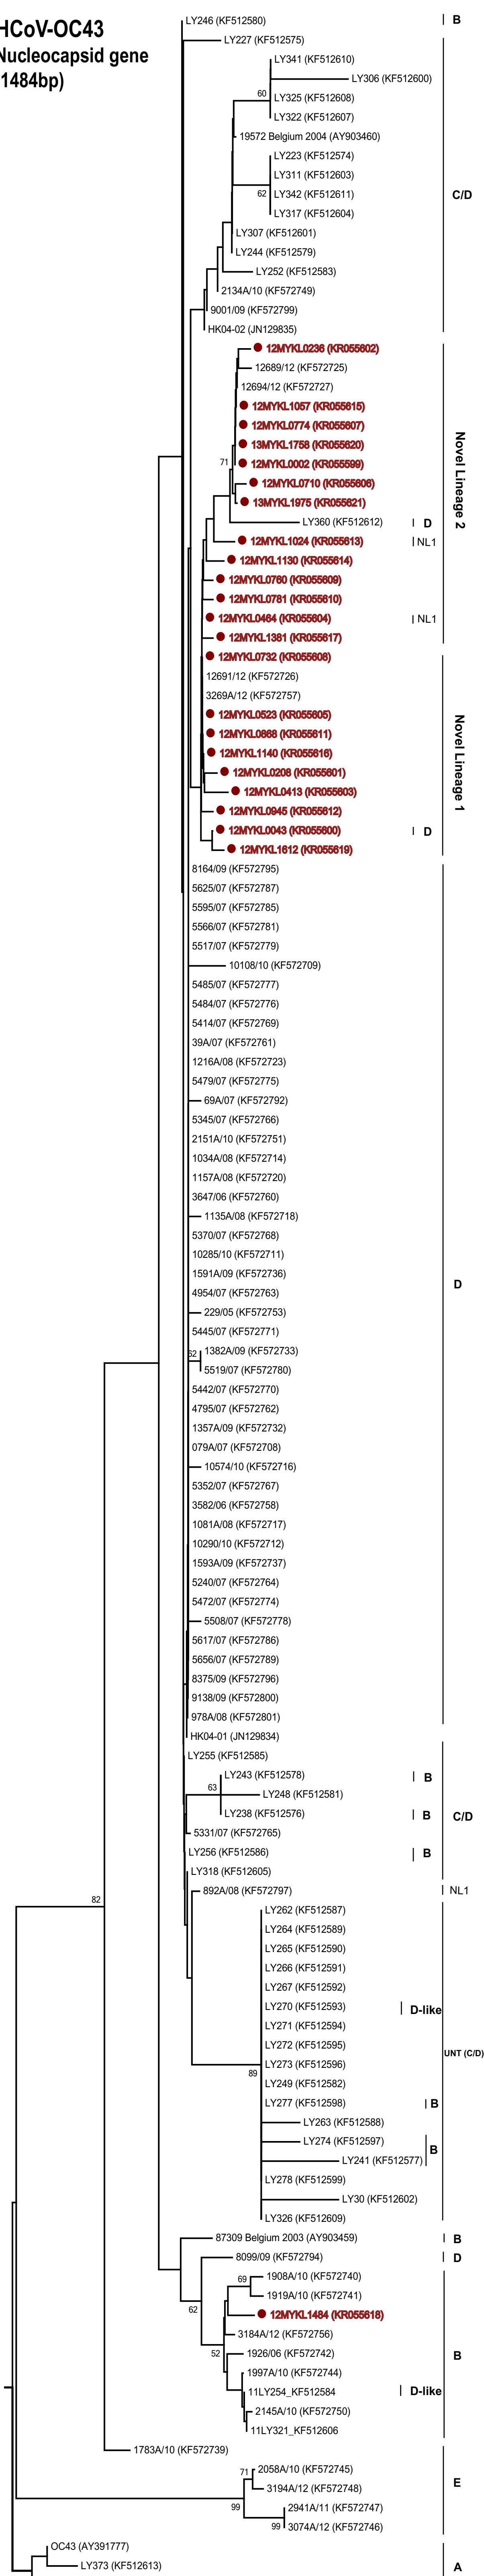

Supplement: 12985_2016_488_MOESM2_ESM.pdf [file 12985_2016_488_MOESM2_ESM.pdf]
