# Supplementary material for: Molecular epidemiology and evolutionary histories of human coronavirus OC43 and HKU1 among patients with upper respiratory tract infections in Kuala Lumpur, Malaysia
Source: PubMed Central journal article supplement (PMC4766700; doi:10.1186/s12985-016-0488-4), 2016-02-25
Supplement: 12985_2016_488_MOESM5_ESM.pdf [file 12985_2016_488_MOESM5_ESM.pdf]

# HCoV-OC43

## 1a (nsp3) gene (1161bp)

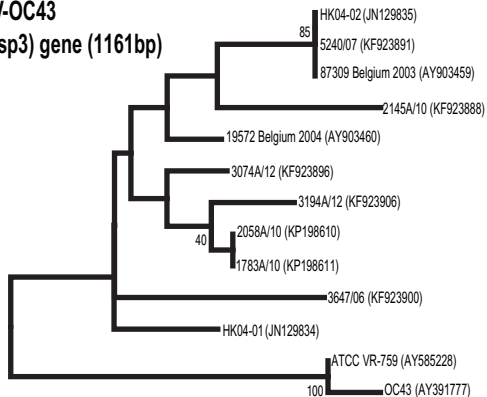

0.001

# HCoV-OC43

## RdRp gene (2783 bp)

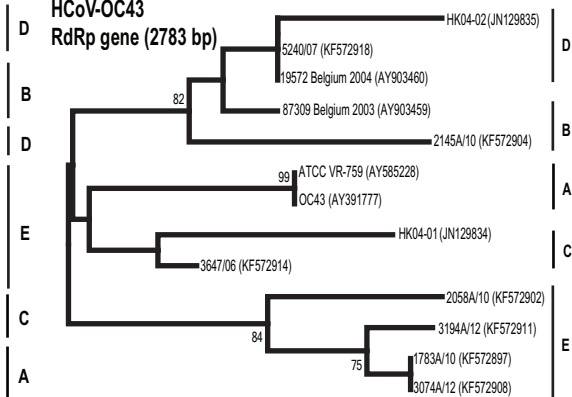

0.0005
