# Supplementary material for: Molecular epidemiology and evolutionary histories of human coronavirus OC43 and HKU1 among patients with upper respiratory tract infections in Kuala Lumpur, Malaysia
Source: Springer Nature journal article supplement (doi:10.1186/s12985-016-0488-4), 2016-02-25

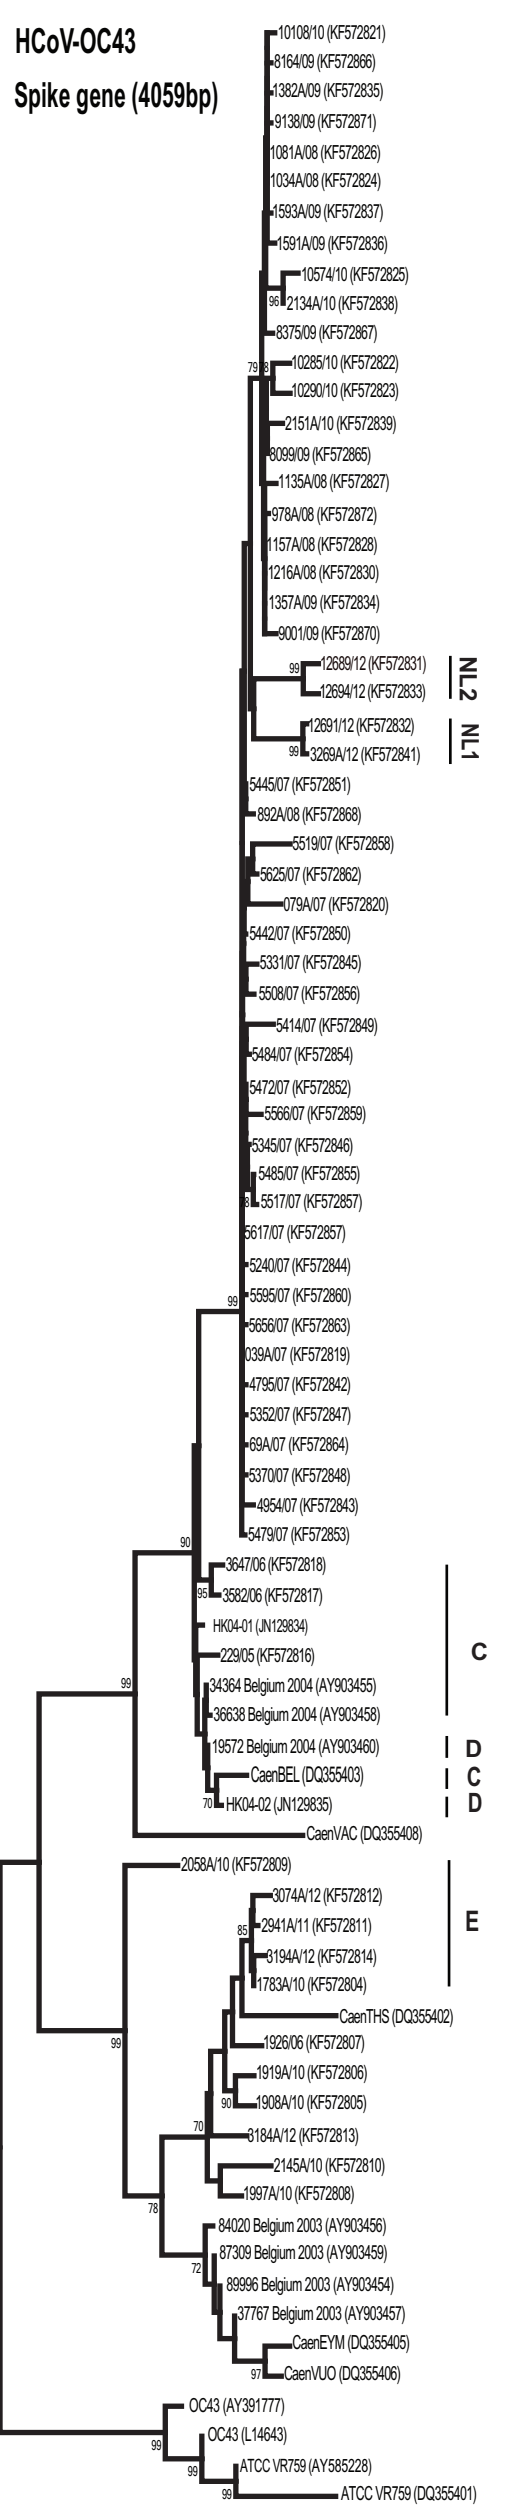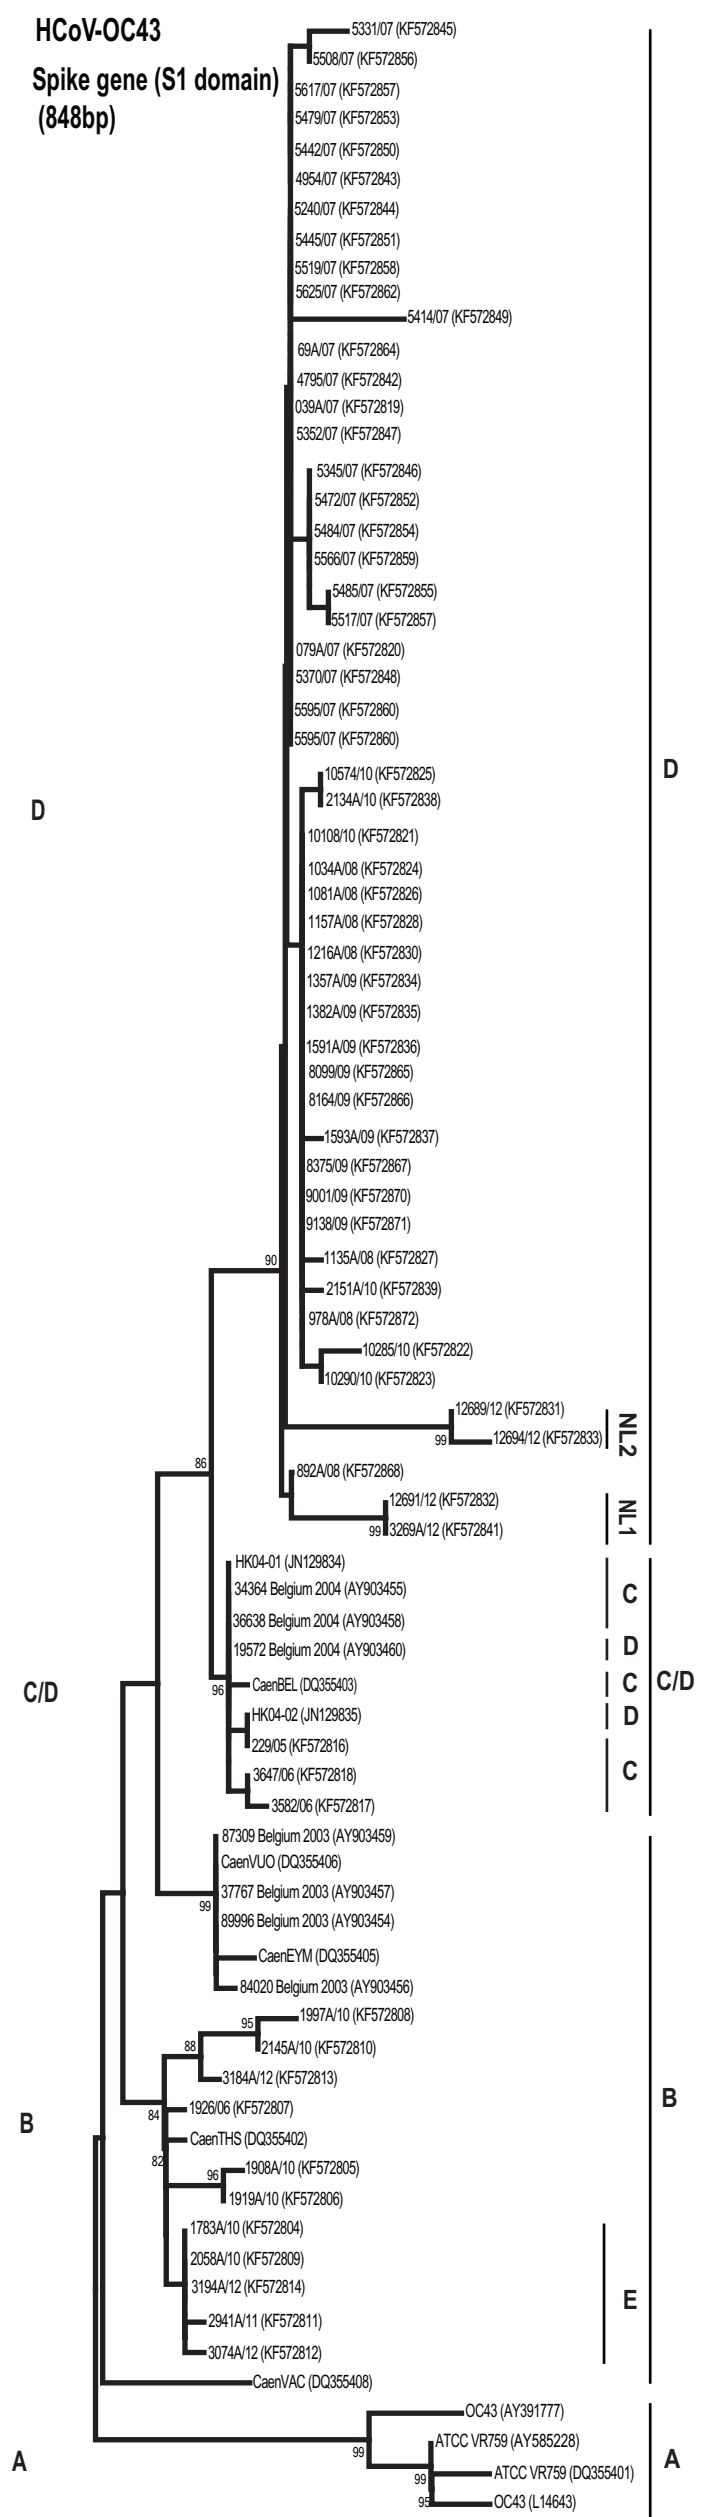

Supplement: MOESM4 [file 9770568]
